# Supplementary material for: Stabilizing Interfacial Structure of LiCoO2 with Ultrahigh Capacity and Prolonged Cyclability at 4.6V
Source: Research Square preprint supplement (doi:10.21203/rs.3.rs-7435444/v1), 2025-09-18
Supplement: Supplementary file 1 [file 78c9cb735020a2b16e92319b.docx]

**Stabilizing Interfacial Structure of LiCoO2 with Ultrahigh Capacity and Prolonged Cyclability at 4.6V**


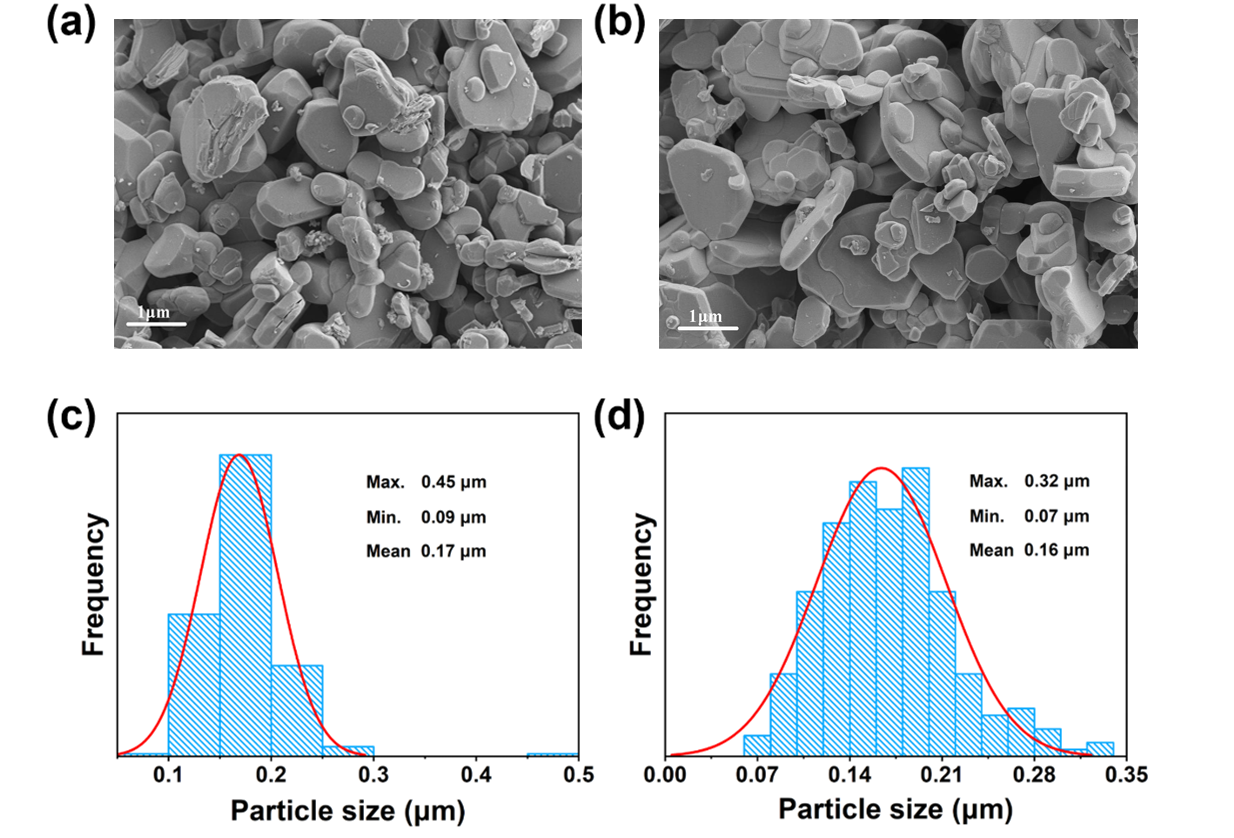


**Fig. S1.** SEM images of (a) LCO and (b) LCO@LGPO.


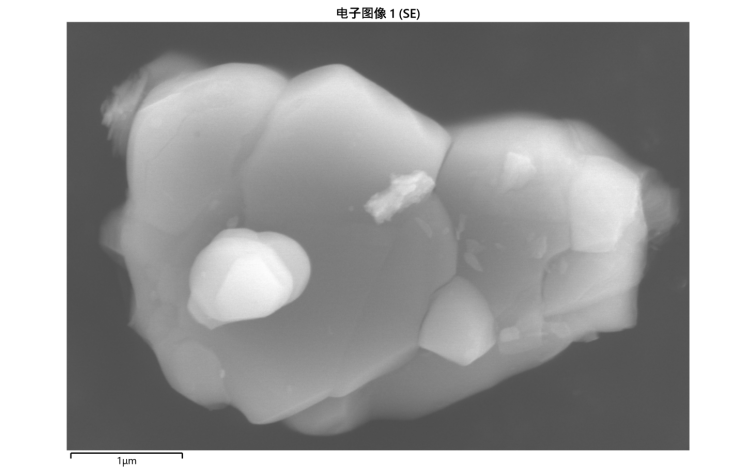

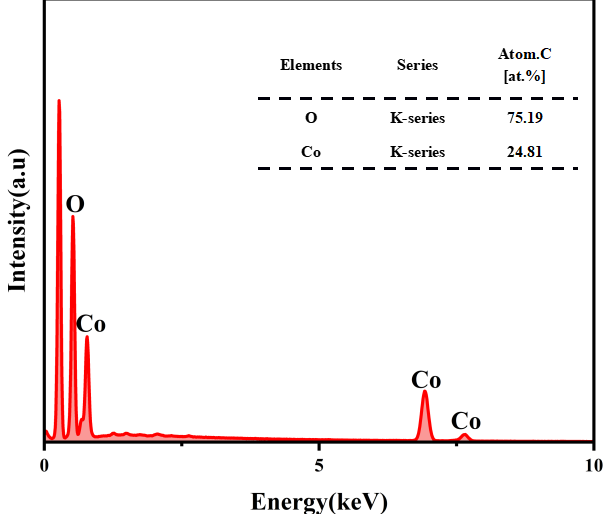


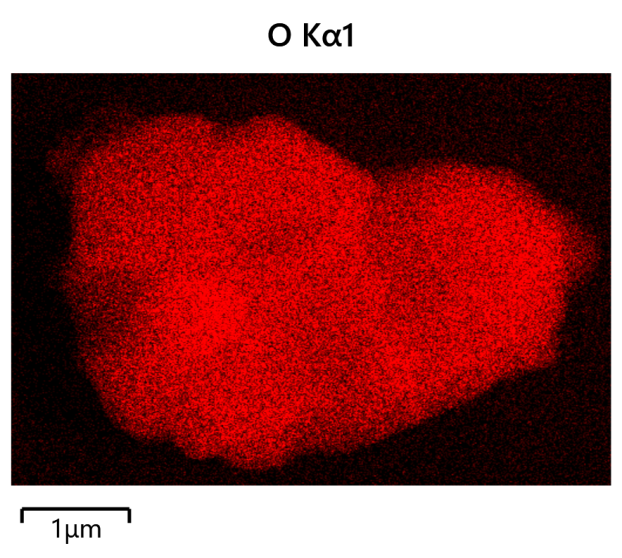

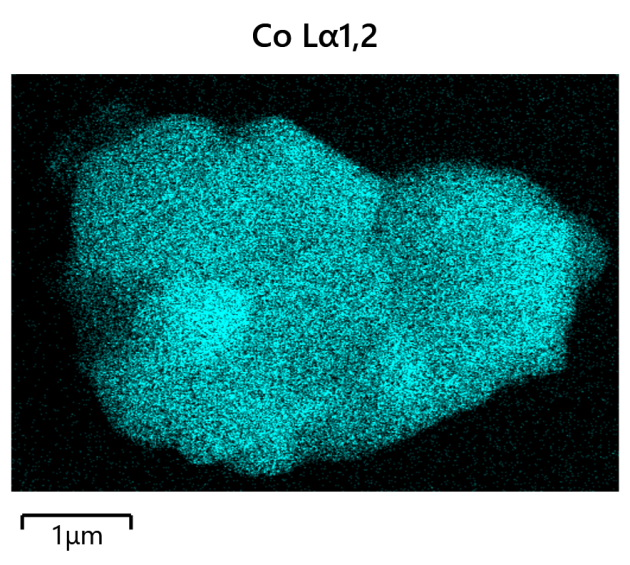


**Fig. S2.** (a) The SEM image and corresponding (b) EDX mappings of LCO.


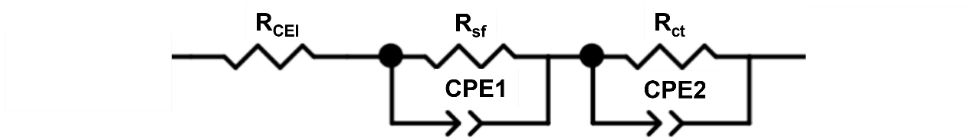


**Fig. S3.** The fitted equivalent circuit of Nyquist plots.


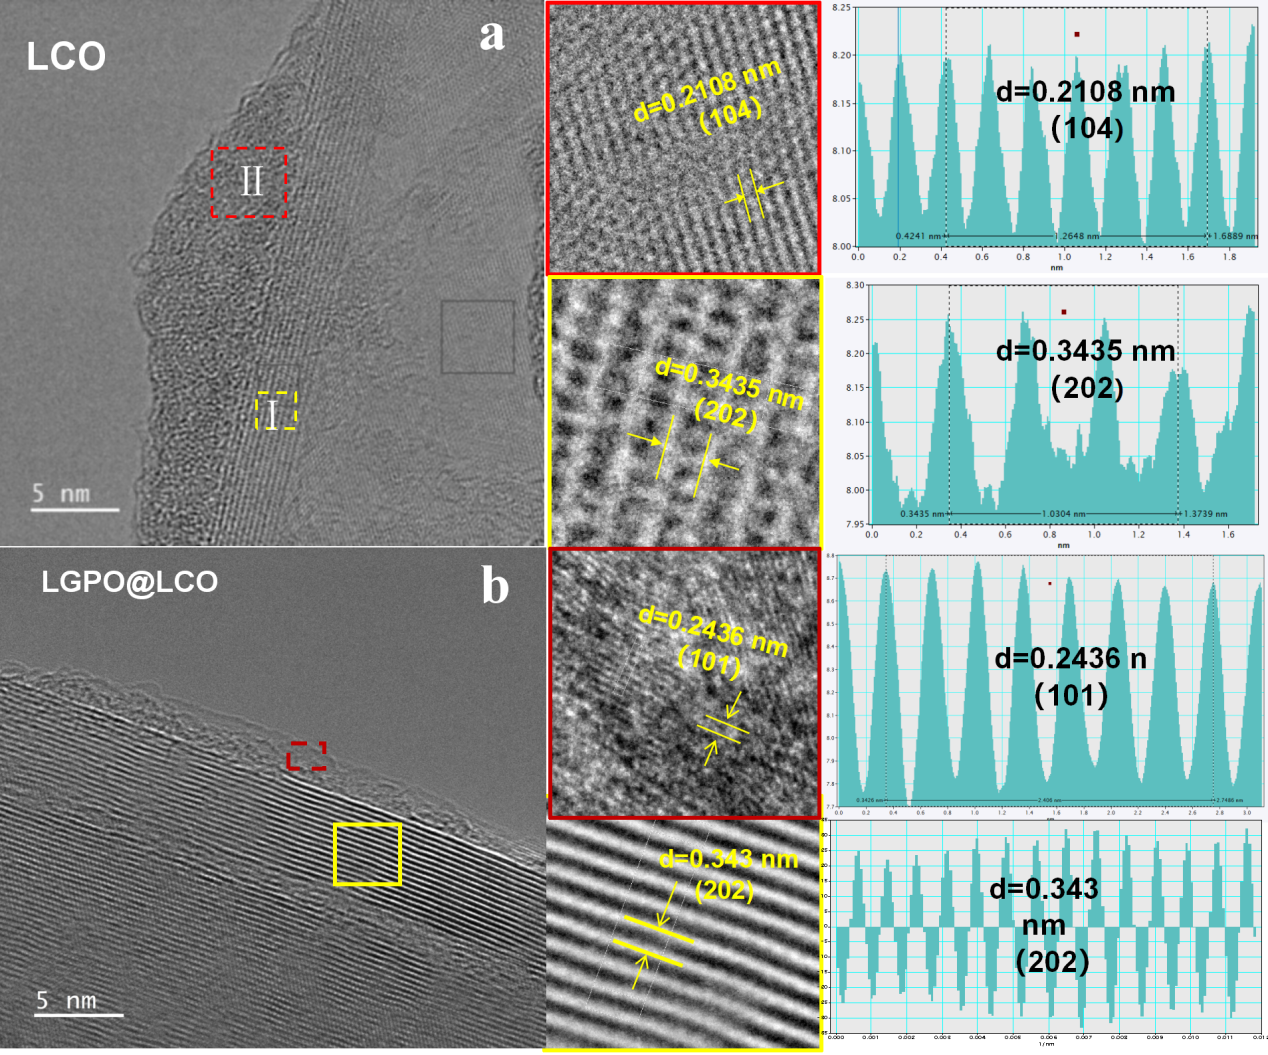


II

I

**Fig. S4.** Transmission electron microscope images of the LCO and LCO@LGPO coating layer, Fourier transform results and inverse Fourier transform results


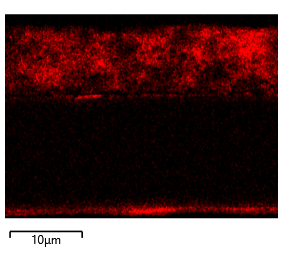

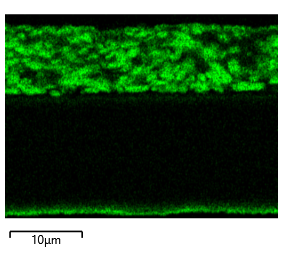

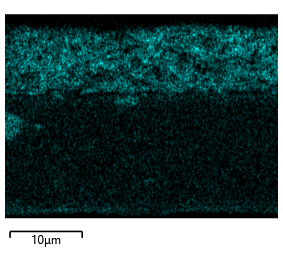

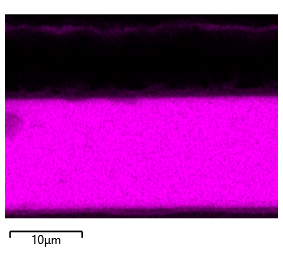

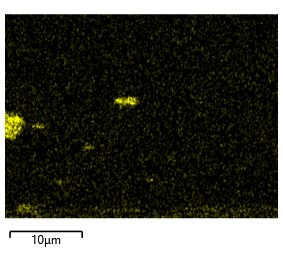

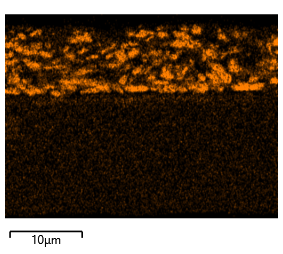


**(f)**

**(e)**

**(d)**

**(c)**

**(b)**

**(a)**


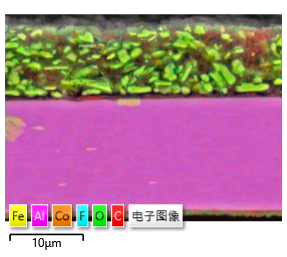

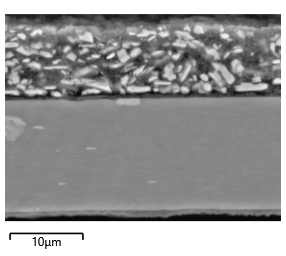


**Fig. S5.** Electron Backscattering Diffraction (EBSD) metal element analysis of cross-sectional microstructures of post-cycling electrode slices of LCO-coated LGPO after 200 cycles, (a) C, (b)O, (c) F,(d) Al, (e) Fe,(f) Co.


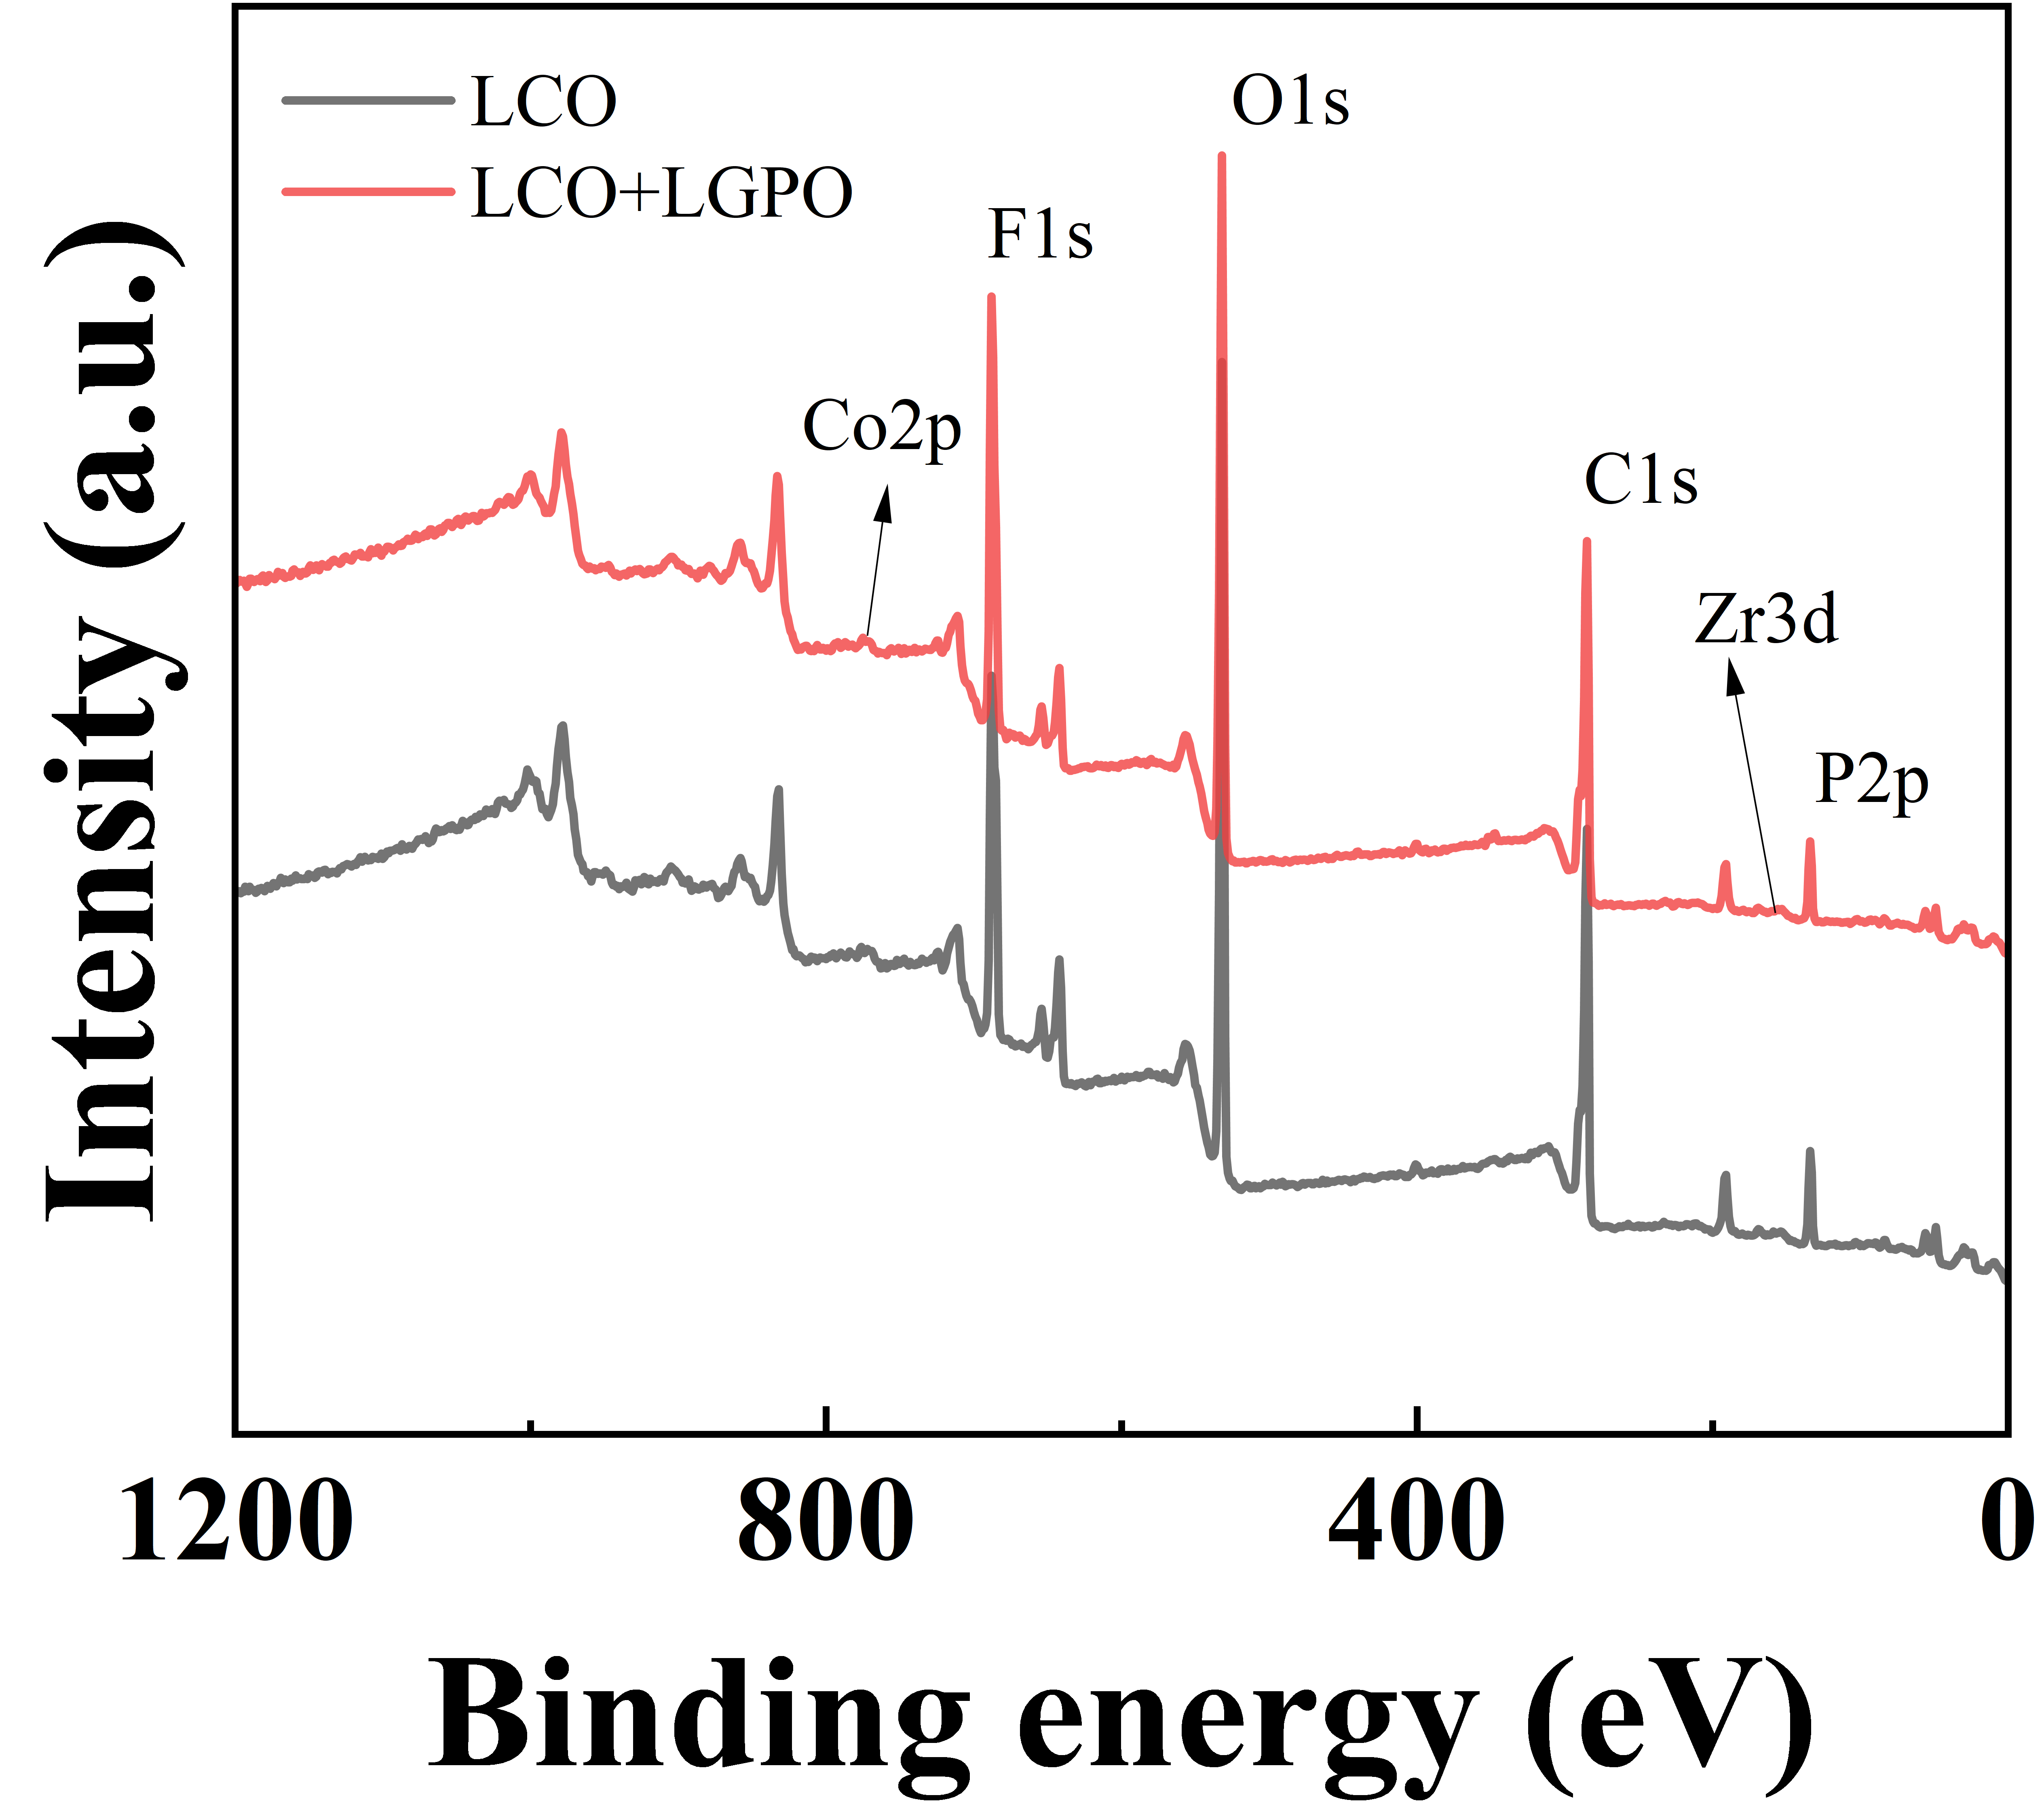


**Fig. S5.** The whole spectra of LCO and LCO@LGPO probed by XPS depth profile.


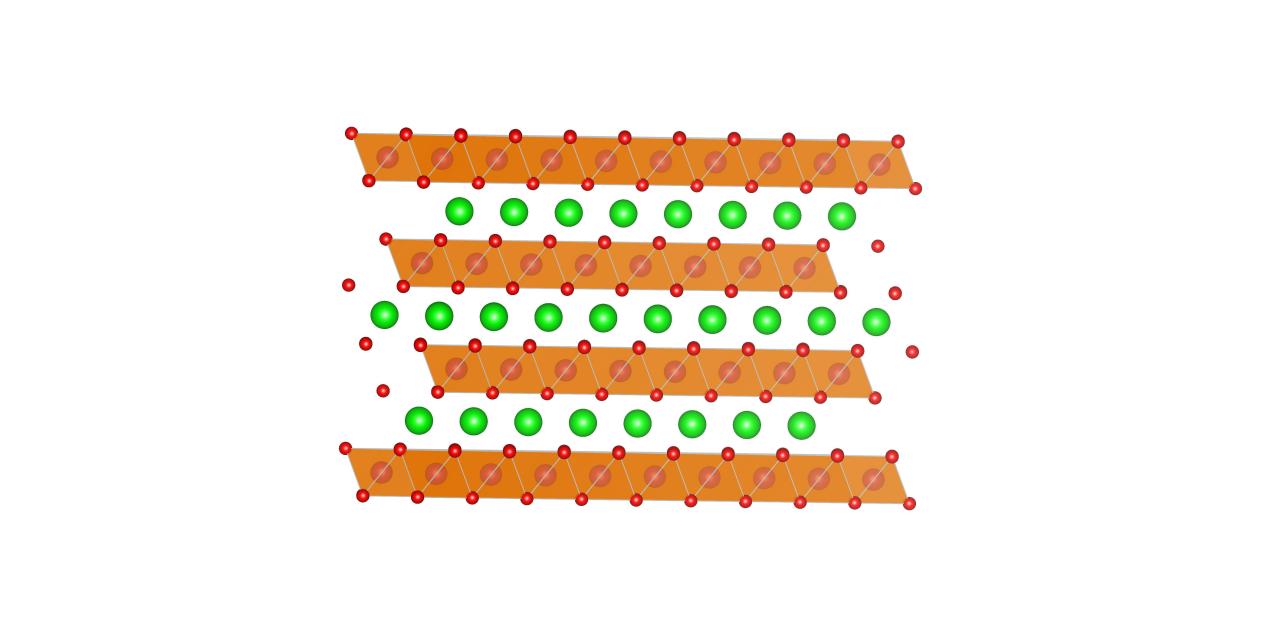

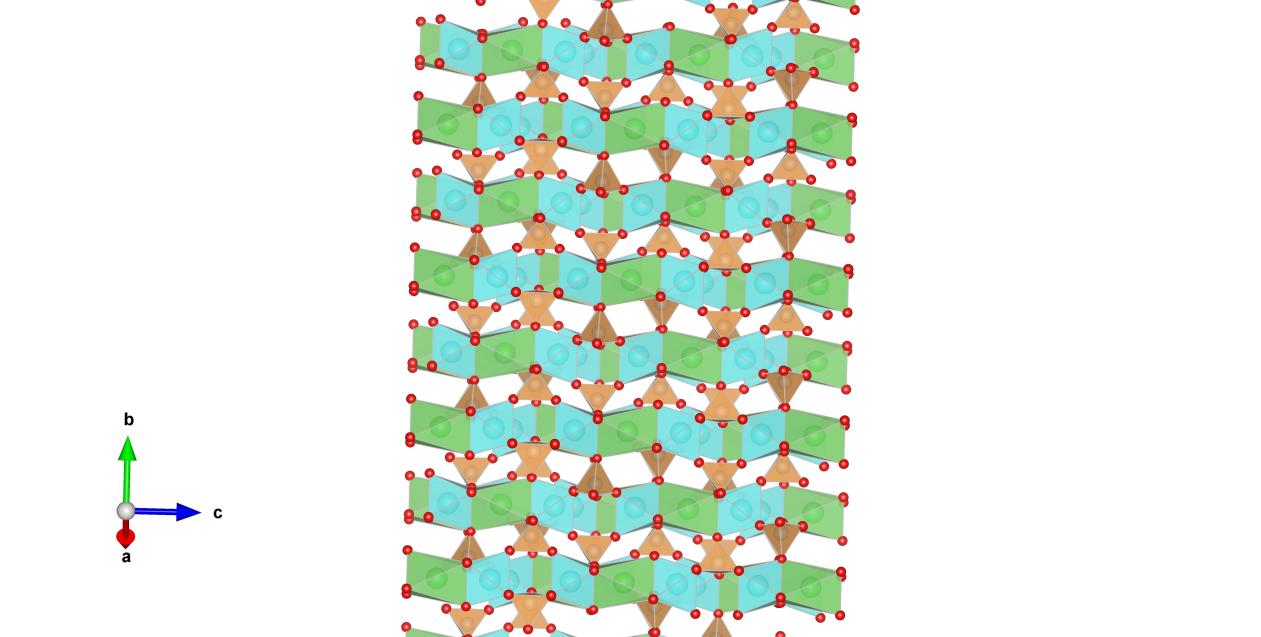


**Fig. S7.** Diagram of crystal structure of (a) LCO and (b) LCO@LGPO.

**Table S1.** The doping concentration of Zr, P and Co in all samples obtained from ICP-MS.

| Samples | Mole ratio /% | | |
| --- | --- | --- | --- |
| Zr | P | Co |
| LCO@LGPO | 0.2415 | 0.1667 | 61.1645 |
| LCO | / | / | 62.2504 |

**Table S2.** Refined refinement lattice parameters of LCO@LGPO and LCO samples.

| Sample | a (Å) | c (Å) | c/a ratio | Refinement parameters |
| --- | --- | --- | --- | --- |
| LCO@LGPO | 2.8537 | 14.1851 | 4.9708 | Rp: 3.88%,Rwp:5.02% |
| LCO | 2.8556 | 14.2086 | 4.9757 | Rp: 4.04%,Rwp:5.52% |

**Table S3.** The mass and volume percentage of each element in the cross-section of LCO@LGPO cathode material.

| Element | Wt% | Wt% Sigma | At% |
| --- | --- | --- | --- |
| C | 23.98 | 0.14 | 40.18 |
| O | 11.92 | 0.06 | 14.99 |
| F | 1.81 | 0.04 | 1.92 |
| Al | 53.50 | 0.11 | 39.90 |
| Fe | 0.33 | 0.02 | 0.12 |
| Co | 8.46 | 0.06 | 2.89 |
| All | 100 |  | 100 |
